# Supplementary material
Source: PubMed Central journal article supplement (PMC2262171)
Supplement: mend_me.2007-0029_1.pdf [file mend_me.2007-0029_1.pdf]

### **Karyotype of MCF-7 cells**

The established breast cancer cell line MCF-7 was obtained from the American Type Culture Collection (ATCC HTB-22, ATCC, Manassas, VA). Cells were cultured in Modified IMEM (Gibco/Invitrogen, Carlsbad, CA.) with 10% FBS (Atlanta Biologicals, Lawrenceville, GA.) and Pen-Strep (Gibco/Invitrogen). Harvesting of cells, fixation, and preparation of metaphase spreads and G-banding was performed using standard procedures (1, 2). Karyotypes were described according to the current ISCN (3).

Supplementary Figure 1 shows the G-banding pattern and karyotype of the MCF-7 cells used in these experiments. The modal number of chromosomes in the MCF-7 cells = 67; range = 55 to 68. Chromosome numbers were in the near-triploid range. There were multiple marker chromosomes including one large submetacentric chromosome and two large subtelocentric chromosomes. Chromosome 9 was monosomic and chromosome 20 was monosomic or nullisomic in all cells. Only one cytogenetically identifiable X chromosome was present per cell. One derivative X chromosome was present clonally, add(X)(q27~28). One derivative chromosome 19 was also present clonally, add(19)(p13). Many additional rearrangements appear to be present which could not be verified by G-banding alone.

The karyotype could not be completely characterized by G-banding. The composite G-band karyotype is described with reference to triploidy, according to ISCN convention: 55-69,add(X)(q27~28)[2],-X[5],-X[5],?add(3)(q21)[4],-9[5],-9[5],-12[5],-13[5],-13[3],-14[5],-15[5],-16[5],-16[3],-17[5],-18[5],-19[3],add(19)(p13)[2],-20[5],-20[5],-21[5],-22[5],+12~19mar[5] [cp5],inc.

These observations are consistent with the cytogenetic and molecular cytogenetic studies for MCF-7 cells reported by other investigators (4-7).

### **ER $\alpha$ and ER $\beta$ expression in MCF-7 cells**

Our previous demonstration of ER $\beta$  protein in MCF-7 cells was based on detection by western blot with ER $\beta$  antibodies H150 and N19 (from Santa Cruz Biotechnology) (8). We reported that ER $\beta$  expression in MCF-7 was  $4.1 \pm 0.4$  fmol/ $\mu$ g whole cell extract protein (WCE) based on 13 different western blots quantified against rhER $\beta$  (baculovirus expressed and quantitated by specific [ $^3$ H]E $_2$  assay) standards. Concomitantly, using monoclonal ER $\alpha$  antibody AER320 (Neomarkers) in western analyses, the estimated ER $\alpha$  protein expression was about half the level of ER $\beta$  =  $2.0 \pm 0.4$  fmol/ $\mu$ g WCE (8). In that publication we noted that lower specific [ $^3$ H]E $_2$  binding, *i.e.*, 0.11-0.16 fmol ER/ $\mu$ g WCE was detected in HAP assays, indicating, as established long ago by many investigators (for example (9, 10)), a loss of E $_2$  binding ability of ER proteins in extracts from cells.

Although numerous investigators have reported ER $\beta$  expression in MCF-7 cells (11-51), the specificity of ER $\beta$  antibodies remains a concern. We previously reported that H150 and AER320 recognized ER $\beta$  and ER $\alpha$ , but not the other ER subtype, respectively demonstrating antibody specificity (52). The specificity of the Santa Cruz N19 ER $\beta$  antibody was demonstrated in work from another lab (53). We note that we have obtained consistent values for ER $\beta$  expression as estimated by quantitative western blot using MCF-7 purchased directly from ATCC at various times from Sept. 2004-Nov. 2006.

SFig2A and B shows western blots for ER $\beta$  using 2 other ER $\beta$  antibodies: PA1-311 and MA1-23217 (Affinity Bioreagents). In SFig2A, we also compare ER $\beta$  in MCF-7 obtained from ATCC *versus* MCF-7 obtained directly from the Karmanos Cancer Center in 2004. The calculated concentration of ER $\beta$  in the 55 kDa band is 4.7 and 2.2 fmol/ $\mu$ g WCE protein for MCF-7 ATCC and MCF-7 Karmanos, respectively. SFig2B shows that monoclonal ER $\beta$  antibody MA1-23217 recognized ER $\beta$  in MCF-7 WCE, but did not recognize rhER $\alpha$ . We note the protein degradation of the WCE used in the right panel of SFig2B.

### Absolute quantification of ER $\alpha$ and ER $\beta$ 1 mRNA by quantitative real-time PCR.

To address the issue of mRNA expression of ER $\alpha$  and ER $\beta$ , quantitative real-time RT-PCR was performed starting with 100 ng of RNA from MCF-7 cells obtained from ATCC and using pCDNA3.1 expression plasmids for hER $\alpha$  and hER $\beta$ 1 (54) for absolute quantification. A standard curve was generated from a dilution series of template DNA of pCDNA 3.1- ER $\alpha$  and pCDNA3.1-ER $\beta$  plasmids of known concentrations (Figure 2D). The standard curve was represented graphically as a plot of threshold cycle, C(t) against the logarithm of the amount of DNA (Figure 2D). The slopes of -3.105 and -2.77 indicates 100 % efficiency of the PCR with ER $\alpha$  and ER $\beta$  primers, respectively ([http://www.finnzymes.fi/pdf/dynamo\\_cdna\\_synthesis\\_kit\\_f470\\_1\\_0.pdf](http://www.finnzymes.fi/pdf/dynamo_cdna_synthesis_kit_f470_1_0.pdf)).

$$\text{PCR efficiency} = \left(10^{\frac{-1}{\text{slope}}}\right) - 1 \times 100 \%$$

The amount of cDNA for ER $\alpha$  and ER $\beta$  from RNA samples prepared from the MCF-7 cells was calculated by linear regression analysis. All of the samples were amplified in triplicate and real-time PCR amplifications were repeated with two separate samples of the MCF-7 cells harvested at different time and normalized to 18S. These data indicate that the cDNA contained 0.12 pg of ER $\alpha$  and 0.24 pg of ER $\beta$ , indicating similar levels of the ER $\alpha$  and ER $\beta$  mRNA in the MCF-7 cells obtained from ATCC and grown in IMEM supplemented with 10% FBS and pen-strep.

#### References in this Supplemental Data:

1. Seabright M 1971 A rapid banding technique for human chromosomes. *Lancet* 2:971-972
2. Seabright M 1973 Improvement of trypsin method for banding chromosomes. *Lancet* 1:1249-1250
3. Shaffer LG, Tommerup N 2005 ISCN (2005): An International System for Human Cytogenetic Nomenclature Basal: S. Krager
4. Whang-Peng J, Lee EC, Kao-Shan CS, Seibert K, Lippman M 1983 Cytogenetic studies of human breast cancer lines: MCF-7 and derived variant sublines. *J Natl Cancer Inst* 71:687-695
5. Klein A, Jung V, Zang KD, Henn W, Montenarh M, Kartarius S, Steudel WI, Urbschat S 2005 Detailed chromosomal characterization of the breast cancer cell line MCF7 with special focus on the expression of the serine-threonine kinase 15. *Oncol Rep* 14:23-31
6. Klein A, Zang KD, Steudel WI, Urbschat S 2006 Different mechanisms of mitotic instability in cancer cell lines. *Int J Oncol* 29:1389-1396
7. Kytölä S, Rummukainen J, Nordgren A, Karhu R, Farnebo F, Larsson C 2000 Chromosomal alterations in 15 breast cancer cell lines by comparative genomic hybridization and spectral karyotyping. *Genes, Chromosomes and Cancer* 28:308-317
8. Dougherty SM, Mazhawidza W, Bohn AR, Robinson KA, Mattingly KA, Blankenship KA, Huff MO, McGregor WG, Klinge CM 2006 Gender difference in the activity but not expression of estrogen receptors alpha and beta in human lung adenocarcinoma cells. *Endocrine-Related Cancer* 13:113-134
9. Klinge CM, Bambara RA, Zain S, Hilf R 1987 Estrogen receptor binding to nuclei from normal and neoplastic rat mammary tissues *in vitro*. *Cancer Res* 47:2852-2859
10. Peale FV, Jr., Ishibe Y, Klinge CM, Zain S, Hilf R, Bambara RA 1989 Rapid purification of the estrogen receptor by sequence-specific DNA affinity chromatography. *Biochemistry* 28:8671-8675

11. Fuqua SA, Schiff R, Parra I, Friedrichs WE, Su JL, McKee DD, Slentz-Kesler K, Moore LB, Willson TM, Moore JT 1999 Expression of wild-type estrogen receptor beta and variant isoforms in human breast cancer. *Cancer Res* 59:5425-5428
12. Jones PS, Parrott E, White IN 1999 Activation of transcription by estrogen receptor alpha and beta is cell type- and promoter-dependent. *J Biol Chem* 274:32008-32014
13. Campbell RA, Bhat-Nakshatri P, Patel NM, Constantinidou D, Ali S, Nakshatri H 2001 Phosphatidylinositol 3-kinase/AKT-mediated activation of estrogen receptor alpha: a new model for anti-estrogen resistance. *J Biol Chem* 276:9817-9824.
14. Castro-Rivera E, Samudio I, Safe S 2001 Estrogen regulation of cyclin D1 gene expression in ZR-75 breast cancer cells involves multiple enhancer elements. *J Biol Chem* 276:30853-30861
15. Denger S, Reid G, Kos M, Flouriot G, Parsch D, Brand H, Korach KS, Sonntag-Buck V, Gannon F 2001 ERalpha Gene Expression in Human Primary Osteoblasts: Evidence for the Expression of Two Receptor Proteins. *Mol Endocrinol* 15:2064-2077.
16. Maggiolini M, Bonofiglio D, Marsico S, Panno ML, Cenni B, Picard D, Ando S 2001 Estrogen receptor alpha mediates the proliferative but not the cytotoxic dose-dependent effects of two major phytoestrogens on human breast cancer cells. *Mol Pharmacol* 60:595-602.
17. Fasco MJ, Hurteau GJ, Spivack SD 2002 Gender-dependent expression of alpha and beta estrogen receptors in human nontumor and tumor lung tissue. *Mol Cell Endocrinol* 188:125-140.
18. Liu MM, Albanese C, Anderson CM, Hilty K, Webb P, Uht RM, Price RH, Jr., Pestell RG, Kushner PJ 2002 Opposing action of estrogen receptors alpha and beta on cyclin D1 gene expression. *J Biol Chem* 277:24353-24360.
19. Lopez D, Sanchez MD, Shea-Eaton W, McLean MP 2002 Estrogen activates the high-density lipoprotein receptor gene via binding to estrogen response elements and interaction with sterol regulatory element binding protein-1A. *Endocrinology* 143:2155-2168.
20. Stabile LP, Davis AL, Gubish CT, Hopkins TM, Luketich JD, Christie N, Finkelstein S, Siegfried JM 2002 Human non-small cell lung tumors and cells derived from normal lung express both estrogen receptor alpha and beta and show biological responses to estrogen. *Cancer Res* 62:2141-2150.
21. Bianco NR, Perry G, Smith MA, Templeton DJ, Montano MM 2003 Functional implications of antiestrogen induction of quinone reductase: inhibition of estrogen-induced deoxyribonucleic acid damage. *Mol Endocrinol* 17:1344-1355
22. Dutertre M, Smith CL 2003 Ligand-Independent Interactions of p160/Steroid Receptor Coactivators and CREB-Binding Protein (CBP) with Estrogen Receptor- $\alpha$ : Regulation by Phosphorylation Sites in the A/B Region Depends on Other Receptor Domains. *Mol Endocrinol* 17:1296-1314
23. Han WD, Mu YM, Lu XC, Xu ZM, Li XJ, Yu L, Song HJ, Li M, Lu JM, Zhao YL, Pan CY 2003 Up-regulation of LRP16 mRNA by 17beta-estradiol through activation of estrogen receptor alpha (ERalpha), but not ERbeta, and promotion of human breast cancer MCF-7 cell proliferation: a preliminary report. *Endocr Relat Cancer* 10:217-224
24. Li L, Li Z, Sacks DB 2003 Calmodulin Regulates the Transcriptional Activity of Estrogen Receptors. SELECTIVE INHIBITION OF CALMODULIN FUNCTION IN SUBCELLULAR COMPARTMENTS. *J Biol Chem* 278:1195-1200.

25. Liu D, Zhang Z, Gladwell W, Teng CT 2003 Estrogen stimulates estrogen-related receptor alpha gene expression through conserved hormone response elements. *Endocrinology* 144:4894-4904
26. Power KA, Thompson LU 2003 Ligand-induced regulation of ERalpha and ERbeta is indicative of human breast cancer cell proliferation. *Breast Cancer Res Treat* 81:209-221
27. Pratt MA, Bishop TE, White D, Yasvinski G, Menard M, Niu MY, Clarke R 2003 Estrogen withdrawal-induced NF-kappaB activity and bcl-3 expression in breast cancer cells: roles in growth and hormone independence. *Mol Cell Biol* 23:6887-6900
28. Stoica GE, Franke TF, Wellstein A, Czubayko F, List HJ, Reiter R, Morgan E, Martin MB, Stoica A 2003 Estradiol Rapidly Activates Akt via the ErbB2 Signaling Pathway. *Mol Endocrinol* 17:818-830.
29. Tschugguel W, Dietrich W, Zhegu Z, Stonek F, Kolbus A, Huber JC 2003 Differential regulation of proteasome-dependent estrogen receptor alpha and beta turnover in cultured human uterine artery endothelial cells. *J Clin Endocrinol Metab* 88:2281-2287
30. Cammarata PR, Chu S, Moor A, Wang Z, Yang S-H, Simpkins JW 2004 Subcellular distribution of native estrogen receptor [alpha] and [beta] subtypes in cultured human lens epithelial cells. *Experimental Eye Research* 78:861-871
31. Chen JQ, Delannoy M, Cooke C, Yager JD 2004 Mitochondrial localization of ERalpha and ERbeta in human MCF7 cells. *Am J Physiol Endocrinol Metab* 286:E1011-1022
32. Jin-Qiang C, Yager JD 2004 Estrogen's Effects on Mitochondrial Gene Expression: Mechanisms and Potential Contributions to Estrogen Carcinogenesis. *Ann NY Acad Sci* 1028:258-272
33. Kian Tee M, Rogatsky I, Tzagarakis-Foster C, Cvorovic A, An J, Christy RJ, Yamamoto KR, Leitman DC 2004 Estradiol and selective estrogen receptor modulators differentially regulate target genes with estrogen receptors alpha and beta. *Mol Biol Cell* 15:1262-1272
34. Murphy L, Cherlet T, Adeyinka A, Niu Y, Snell L, Watson P 2004 Phospho-serine-118 estrogen receptor-alpha detection in human breast tumors in vivo. *Clin Cancer Res* 10:1354-1359
35. Peekhaus N, Chang T, Hayes E, Wilkinson H, Mitra S, Schaeffer J, Rohrer S 2004 Distinct effects of the antiestrogen Faslodex on the stability of estrogen receptors-alpha and -beta in the breast cancer cell line MCF-7. *J Mol Endocrinol* 32:987-995
36. Strom A, Hartman J, Foster JS, Kietz S, Wimalasena J, Gustafsson J-A 2004 Estrogen receptor {beta} inhibits 17{beta}-estradiol-stimulated proliferation of the breast cancer cell line T47D. *PNAS*:0308319100
37. Tang H-Y, Lin H-Y, Zhang S, Davis FB, Davis PJ 2004 Thyroid Hormone Causes Mitogen-Activated Protein Kinase-Dependent Phosphorylation of the Nuclear Estrogen Receptor. *Endocrinology* 145:3265-3272
38. Chen B, Gajdos C, Dardes R, Kidwai N, Johnston SR, Dowsett M, Jordan VC 2005 Potential of endogenous estrogen receptor beta to influence the selective ER modulator ERbeta complex. *Int J Oncol* 27:327-335
39. Gougelet A, Bouclier C, Marsaud V, Maillard S, Mueller SO, Korach KS, Renoir J-M 2005 Estrogen receptor [alpha] and [beta] subtype expression and transactivation capacity are differentially affected by receptor-, hsp90- and immunophilin-ligands in human breast cancer cells. *The Journal of Steroid Biochemistry and Molecular Biology* 94:71-81

40. Hershberger PA, Vasquez AC, Kanterewicz B, Land S, Siegfried JM, Nichols M 2005 Regulation of endogenous gene expression in human non-small cell lung cancer cells by estrogen receptor ligands. *Cancer Res* 65:1598-1605
41. Horner-Glister E, Maleki-Dizaji M, Guerin CJ, Johnson SM, Styles J, White INH 2005 Influence of oestradiol and tamoxifen on oestrogen receptors- $\alpha$  and - $\beta$  protein degradation and non-genomic signalling pathways in uterine and breast carcinoma cells. *J Mol Endocrinol* 35:421-432
42. Masuhiro Y, Mezaki Y, Sakari M, Takeyama K-i, Yoshida T, Inoue K, Yanagisawa J, Hanazawa S, O'Malley BW, Kato S 2005 Splicing potentiation by growth factor signals via estrogen receptor phosphorylation. *PNAS* 102:8126-8131
43. Pietras RJ, Marquez DC, Chen HW, Tsai E, Weinberg O, Fishbein M 2005 Estrogen and growth factor receptor interactions in human breast and non-small cell lung cancer cells. *Steroids* 70:372-381
44. Solakidi S, Psarra AM, Sekeris CE 2005 Differential subcellular distribution of estrogen receptor isoforms: Localization of ER $\alpha$  in the nucleoli and ER $\beta$  in the mitochondria of human osteosarcoma SaOS-2 and hepatocarcinoma HepG2 cell lines. *Biochim Biophys Acta* 1745:382-392
45. Weinberg OK, Marquez-Garban DC, Fishbein MC, Goodglick L, Garban HJ, Dubinett SM, Pietras RJ 2005 Aromatase Inhibitors in Human Lung Cancer Therapy. *Cancer Res* 65:11287-11291
46. Barker S, Malouitre SDM, Glover HR, Puddefoot JR, Vinson GP 2006 Comparison of effects of 4-hydroxy tamoxifen and trilostane on oestrogen-regulated gene expression in MCF-7 cells: Up-regulation of oestrogen receptor beta. *The Journal of Steroid Biochemistry and Molecular Biology* 100:141-151
47. Chang EC, Frasor J, Komm B, Katzenellenbogen BS 2006 Impact of Estrogen Receptor  $\beta$  on Gene Networks Regulated by Estrogen Receptor  $\alpha$  in Breast Cancer Cells. *Endocrinology* 147:4831-4842
48. Pedram A, Razandi M, Wallace DC, Levin ER 2006 Functional Estrogen Receptors in the Mitochondria of Breast Cancer Cells. *Mol Biol Cell* 17:2125-2137
49. Al-Dhaheeri MH, Rowan BG 2007 Protein Kinase A Exhibits Selective Modulation of Estradiol-Dependent Transcription in Breast Cancer Cells that Is Associated with Decreased Ligand Binding, Altered Estrogen Receptor  $\alpha$  Promoter Interaction, and Changes in Receptor Phosphorylation. *Mol Endocrinol* 21:439-456
50. Marquez-Garban DC, Chen H-W, Fishbein MC, Goodglick L, Pietras RJ 2007 Estrogen receptor signaling pathways in human non-small cell lung cancer. *Steroids* 72:135-143
51. Zhao C, Matthews J, Tujague M, Wan J, Strom A, Toresson G, Lam EWF, Cheng G, Gustafsson J-A, Dahlman-Wright K 2007 Estrogen Receptor  $\beta$ 2 Negatively Regulates the Transactivation of Estrogen Receptor  $\alpha$  in Human Breast Cancer Cells. *Cancer Res* 67:3955-3962
52. Klinge CM, Blankenship KA, Risinger KE, Bhatnagar S, Noisin EL, Sumanasekera WK, Brey DM, Keynton RS 2005 Resveratrol and estradiol rapidly activate MAPK signaling through estrogen receptors alpha and beta in endothelial cells. *J Biol Chem* 280:7460-7468
53. Bukovsky A, Caudle M, Cekanova M, Fernando R, Wimalasena J, Foster J, Henley D, Elder R 2003 Placental expression of estrogen receptor beta and its hormone binding variant - comparison with estrogen receptor alpha and a role for estrogen receptors in

- asymmetric division and differentiation of estrogen-dependent cells. *Reproductive Biology and Endocrinology* 1:36
54. Ramsey TL, Risinger KE, Jernigan SC, Mattingly KA, Klinge CM 2004 Estrogen Receptor {beta} Isoforms Exhibit Differences in Ligand-Activated Transcriptional Activity in an Estrogen Response Element Sequence-Dependent Manner. *Endocrinology* 145:149-160
  55. Riggs KA, Wickramasinghe NS, Cochrum RK, Watts MB, Klinge CM 2006 Decreased Chicken Ovalbumin Upstream Promoter Transcription Factor II Expression in Tamoxifen-Resistant Breast Cancer Cells. *Cancer Res* 66:10188-10198
  56. Kulakosky PC, Jernigan SC, McCarty MA, Klinge CM 2002 Response element sequence regulates estrogen receptor alpha and beta affinity and activity. *J Mol Endocrinol* 29:137-152
  57. Kulakosky PC, Klinge CM 2003 Maximizing production of estrogen receptor beta with the baculovirus expression system. *BioTechniques* 34:334-343
  58. Ivanova MM, Mattingly KA, Klinge CM 2007 Estrogen receptor beta yield from baculovirus lytic infection is higher than from stably transformed Sf21 cells. *Appl Microbiol Biotechnol* 74:1256-1263
