# Supplementary material
Source: PubMed Central journal article supplement (PMC2262171)
Supplement: mend_me.2007-0029_4.pdf [file mend_me.2007-0029_4.pdf]

**Supplemental Data Table 1: Estimate of ER $\beta$  concentration in MCF-7-ATCC cells.**

| <b>H150 (Santa Cruz)</b> | <b>N19 (Santa Cruz)</b> | <b>PA1-311 (Affinity Bioreagents)</b> | <b>MA1-23217 (14C8) (Affinity Bioreagents)</b> |
|--------------------------|-------------------------|---------------------------------------|------------------------------------------------|
| 4.9 $\pm$ 0.5            | 3.4 $\pm$ 0.4           | 4.7 $\pm$ 0.3                         | 0.11 $\pm$ 0.01                                |

To estimate ER $\beta$  protein expression, known concentrations, as assayed by [<sup>3</sup>H]E<sub>2</sub> binding (1), of baculovirus-expressed recombinant human (rh) ER $\beta$  protein were separated in parallel with the WCE of MCF-7 cells and used as calibrators to estimate ER $\beta$  expression levels by western blot using the indicated antibodies (2). Values are fmol/ $\mu$ g WCE.

**References:**

1. Kulakosky PC, Jernigan SC, McCarty MA, Klinge CM 2002 Response element sequence regulates estrogen receptor alpha and beta affinity and activity. *J Mol Endocrinol* 29:137-152
2. Dougherty SM, Mazhawidza W, Bohn AR, Robinson KA, Mattingly KA, Blankenship KA, Huff MO, McGregor WG, Klinge CM 2006 Gender difference in the activity but not expression of estrogen receptors alpha and beta in human lung adenocarcinoma cells. *Endocrine-Related Cancer* 13:113-134
