# Supplementary material
Source: PubMed Central journal article supplement (PMC2262171)
Supplement: mend_me.2007-0029_5.pdf [file mend_me.2007-0029_5.pdf]

**Supplemental Table 2: Genes induced by estradiol in MCF-7 cells that are related to mitochondrial function.** This data was compiled by listing the identity of genes that participate in mitochondrial function and which were significantly increased in response to 24 h treatment of MCF-7 human breast cancer cells with 10 nM E<sub>2</sub> (1,2). This list includes nuclear-encoded genes relevant to mitochondrial function that participate in a variety of mitochondrial functions. The increased gene expression after 24 h of E<sub>2</sub> is a time period consistent with secondary gene expression. These microarray data lend support to our theory that E<sub>2</sub> stimulates a global upregulation in mitochondrial activity initiated by an increase in NRF-1.

| <b>Gene Function</b>            | <b>Gene</b>                                                                    | <b>Upregulated</b>                     | <b>Ref</b> |
|---------------------------------|--------------------------------------------------------------------------------|----------------------------------------|------------|
| <b>Transcription Factors</b>    |                                                                                |                                        |            |
|                                 | Nuclear Respiratory Factor -1 (NRF-1)                                          | increased at 8 h and sustained to 24 h | (1,2)      |
|                                 | transcription factor A, mitochondrial                                          | induced at 24h                         | (1,2)      |
|                                 | transcription factor B2, mitochondrial                                         | induced at 24h                         | (1,2)      |
| <b>Translocases</b>             |                                                                                |                                        |            |
|                                 | translocase of outer mitochondrial membrane 20 homolog (yeast)                 | induced at 24h                         | (1)        |
|                                 | translocase of inner mitochondrial membrane 50 homolog (yeast)                 | induced at 24h                         | (1)        |
|                                 | translocase of inner mitochondrial membrane 8                                  | induced at 24h                         | (2)        |
|                                 | translocase of outer mitochondrial membrane 40 homolog                         | induced at 24h                         | (2)        |
| <b>Electron Transport Chain</b> |                                                                                |                                        |            |
|                                 | ATP synthase, subunit c                                                        | increased 12 to 24 hr                  | (1,2)      |
|                                 | ATP synthase, H <sup>+</sup> transporting, mitochondrial F0 complex, subunit g | 24 h                                   | (1)        |
| <b>Ribosomal Proteins</b>       |                                                                                |                                        |            |
|                                 | mitochondrial ribosomal protein S12                                            | induced at 24h                         | (1,2)      |
|                                 | mitochondrial ribosomal protein L2                                             | induced at 24h                         | (1)        |
|                                 | mitochondrial ribosomal protein L3                                             | induced at 24h                         | (1,2)      |
|                                 | mitochondrial ribosomal protein L17                                            | induced at 24h                         | (1,2)      |
|                                 | mitochondrial ribosomal protein L24                                            | induced at 24h                         | (1)        |
|                                 | mitochondrial ribosomal protein S27                                            | induced at 24h                         | (1)        |
|                                 | mitochondrial ribosomal protein L4                                             | induced at 24h                         | (2)        |
|                                 | mitochondrial ribosomal                                                        | induced at 24h                         | (2)        |

|                        |                                                                                             |                |       |
|------------------------|---------------------------------------------------------------------------------------------|----------------|-------|
|                        | protein S17                                                                                 |                |       |
|                        | mitochondrial ribosomal protein L18                                                         | induced at 24h | (2)   |
|                        | mitochondrial ribosomal protein L39                                                         | induced at 24h | (2)   |
|                        | mitochondrial ribosomal protein L15                                                         | induced at 24h | (2)   |
|                        | mitochondrial ribosomal protein L12                                                         | induced at 24h | (2)   |
|                        | mitochondrial ribosomal protein S15                                                         | induced at 24h | (2)   |
|                        | mitochondrial ribosomal protein L11                                                         | induced at 24h | (2)   |
|                        | mitochondrial ribosomal protein L39                                                         | induced at 24h | (2)   |
| <b>Kinases</b>         |                                                                                             |                |       |
|                        | creatine kinase, mitochondrial 1                                                            | induced at 24h | (1)   |
|                        | creatine kinase, mitochondrial 2                                                            | induced at 24h | (2)   |
| <b>Transferases</b>    |                                                                                             |                |       |
|                        | serine hydroxyl-methyltransferase 2 (mitochondrial)                                         | induced at 24h | (1,2) |
|                        | glutamic-oxaloacetic transaminase 2, mitochondrial (aspartate aminotransferase 2)           | induced at 24h | (2)   |
| <b>Solute Carriers</b> |                                                                                             |                |       |
|                        | solute carrier family 25 (mitochondrial carrier; ornithine transporter)                     | induced at 24h | (2)   |
|                        | solute carrier family 25 (mitochondrial carrier; adenine nucleotide translocator), member 5 | induced at 24h | (2)   |
| <b>Miscellaneous</b>   |                                                                                             |                |       |
|                        | malic enzyme 2, NAD(+)-dependent, mitochondrial                                             | induced at 24h | (2)   |
|                        | lon peptidase 1, mitochondrial LON                                                          | induced at 24h | (2)   |
|                        | glycerol-3-phosphate dehydrogenase 2                                                        | induced at 24h | (2)   |
|                        | aspartyl-tRNA synthetase 2                                                                  | induced at 24h | (2)   |
|                        | cytochrome b5 type B (outer mitochondrial membrane)                                         | induced at 24h | (2)   |

## REFERENCES:

1. Creighton, C. J., Cordero, K. E., Larios, J. M., Miller, R. S., Johnson, M. D., Chinnaiyan, A. M., Lippman, M. E., and Rae, J. M. (2006) *Genome Biol.* 7(4), R28
2. Rae, J. M., Johnson, M. D., Scheys, J. O., Cordero, K. E., Larios, J. M., and Lippman, M. E. (2005) *Breast Cancer Res Treat.* 92(2), 141-149
