# Supplementary material
Source: PubMed Central journal article supplement (PMC2262171)

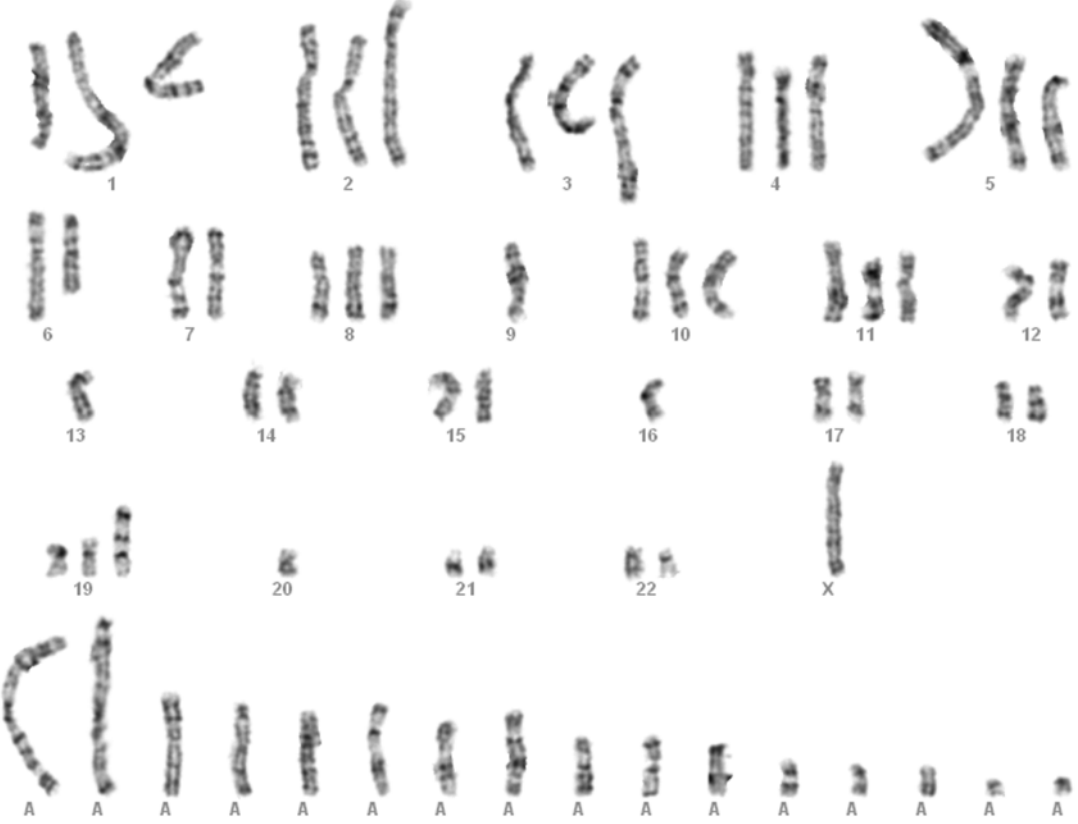

Supplement: mend_me.2007-0029_2.pdf [file mend_me.2007-0029_2.pdf]

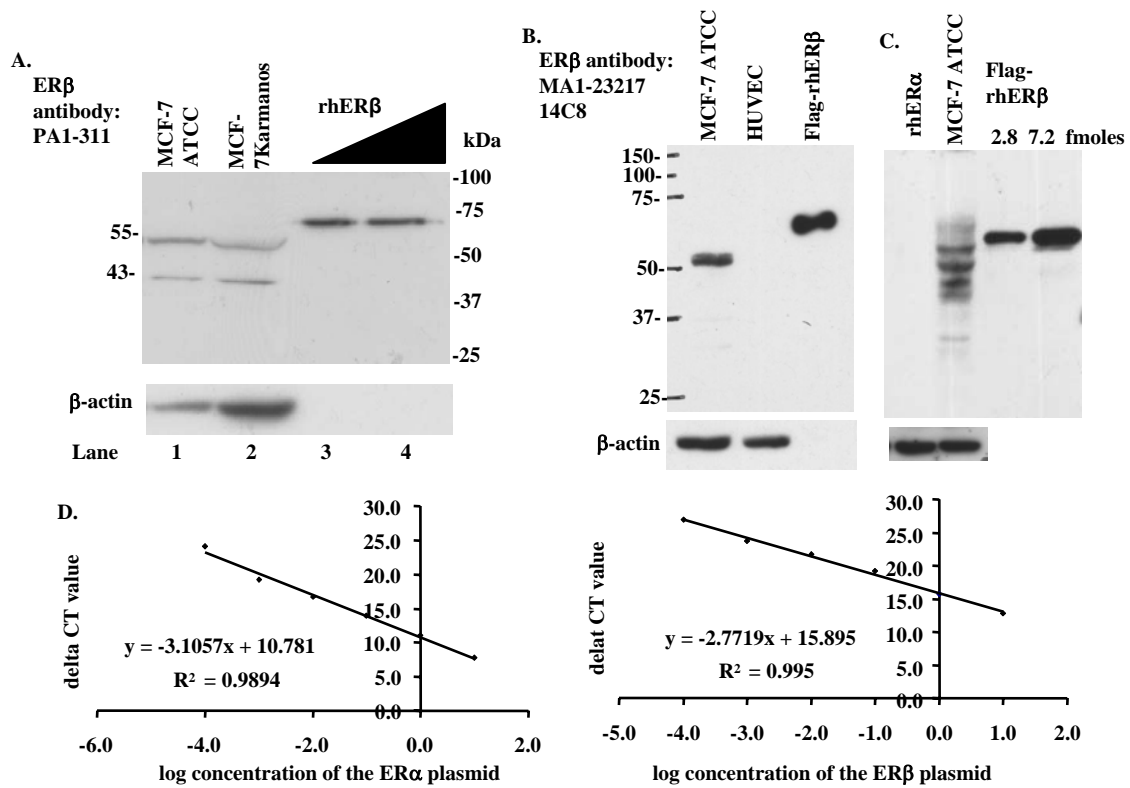

Supp. Fig. 2

Supplement: mend_me.2007-0029_3.pdf [file mend_me.2007-0029_3.pdf]
